# Supplementary material
Source: HighWire-hosted journal article supplement (https://bmjopen.bmj.com/content/12/9/e066145)
Supplement: inline-supplementary-material-1 [file inline-supplementary-material-1.pdf]

The questionnaire about the household's out-of-pocket healthcare expenditures

1. Formal Consent was provided:

- ☐ Yes
- ☐ No

**Predisposing factors**

2. Household head gender:

- ☐ Male
- ☐ Female

3. Household head age:

4. Household head marital status

- ☐ Married
- ☐ Not married

5. Household head living condition

- ☐ Alone
- ☐ With family

6. Household size

7. Household head educational

- ☐ Illiterate/read/write
- ☐ School degree
- ☐ Higher education

8. Presence of at least one member less than 14 years

- ☐ Yes
- ☐ No

9. Nationality

- ☐ Saudi
- ☐ Non-Saudi

**Enabling factors**

10. Household head employment status

- ☐ Employed
- ☐ Unemployed

11. Residential area

- ☐ Urban
- ☐ Rural

12. Having a regular doctor:

- ☐ Yes
- ☐ No

13. Having health insurance:

- ☐ Yes
- ☐ No

14. Households' asset holdings

|                      |                                                                                                                                                                                                                            |                             |                                                                                                                                                                              |
|----------------------|----------------------------------------------------------------------------------------------------------------------------------------------------------------------------------------------------------------------------|-----------------------------|------------------------------------------------------------------------------------------------------------------------------------------------------------------------------|
| Type of housing      | <input type="checkbox"/> A Traditional Home<br><input type="checkbox"/> A Villa<br><input type="checkbox"/> A Floor In A Villa<br><input type="checkbox"/> An Apartment<br><input type="checkbox"/> Other Forms Of Housing | Housing tenure              | <input type="checkbox"/> House Owned<br><input type="checkbox"/> Home Leased<br><input type="checkbox"/> The Home Provided<br><input type="checkbox"/> Other Forms Of Tenure |
| Car ownership        | <input type="checkbox"/> No Car<br><input type="checkbox"/> One Car<br><input type="checkbox"/> Two Or More Cars                                                                                                           | Phone available             | <input type="checkbox"/> Yes <input type="checkbox"/> No                                                                                                                     |
| Television available | <input type="checkbox"/> Yes <input type="checkbox"/> No                                                                                                                                                                   | Personal computer available | <input type="checkbox"/> Yes <input type="checkbox"/> No                                                                                                                     |
| Internet access      | <input type="checkbox"/> Yes <input type="checkbox"/> No                                                                                                                                                                   | Library available           | <input type="checkbox"/> Yes <input type="checkbox"/> No                                                                                                                     |
| Satellite available  | <input type="checkbox"/> Yes <input type="checkbox"/> No                                                                                                                                                                   | Video available             | <input type="checkbox"/> Yes <input type="checkbox"/> No                                                                                                                     |

|                       |                                                          |  |  |
|-----------------------|----------------------------------------------------------|--|--|
| Video games available | <input type="checkbox"/> Yes <input type="checkbox"/> No |  |  |
|-----------------------|----------------------------------------------------------|--|--|

**Need-based factors**

## 15. Household head's level of physical activity

- ☐ Active (at least 75 minutes of vigorous activity or at least 150 minutes of moderate or vigorous activity per week)
- ☐ Moderately active (1 to 74 minutes of vigorous activity or 1 to 149 minutes of moderate or vigorous activity per week)
- ☐ Inactive ( 0 minutes of moderate or vigorous activity per week)

## 16. Presence of at least one member with a chronic condition

- ☐ Yes
- ☐ No

## 17. Presence of at least one member with a disability:

- ☐ Yes
- ☐ No

## 18. Presence of at least one pregnant member:

- ☐ Yes
- ☐ No

## 19. The number of members with a chronic condition in the households:

## 20. Current chronic condition

|                          |                                                          |                     |                                                          |
|--------------------------|----------------------------------------------------------|---------------------|----------------------------------------------------------|
| Dyslipidemia             | <input type="checkbox"/> Yes <input type="checkbox"/> No | Hypertension        | <input type="checkbox"/> Yes <input type="checkbox"/> No |
| Diabetes mellitus        | <input type="checkbox"/> Yes <input type="checkbox"/> No | Cancer              | <input type="checkbox"/> Yes <input type="checkbox"/> No |
| Thyroid disease          | <input type="checkbox"/> Yes <input type="checkbox"/> No | Asthma              | <input type="checkbox"/> Yes <input type="checkbox"/> No |
| Kidney Disease           | <input type="checkbox"/> Yes <input type="checkbox"/> No | Psychiatric disease | <input type="checkbox"/> Yes <input type="checkbox"/> No |
| Congestive Heart Failure | <input type="checkbox"/> Yes <input type="checkbox"/> No | Anemia              | <input type="checkbox"/> Yes <input type="checkbox"/> No |
| Pneumonia                | <input type="checkbox"/> Yes <input type="checkbox"/> No | <b>OTHER</b>        |                                                          |

**OOPHE Components**

23. Monthly out-of-pocket on services:

24. Monthly out-of-pocket on medicine:

26. Monthly out-of-pocket on other expenses:
